# Supplementary material for: Age-based partitioning of individual genomic inbreeding levels in Belgian Blue cattle
Source: Springer Nature journal article supplement (doi:10.1186/s12711-017-0370-x), 2017-12-01

**a**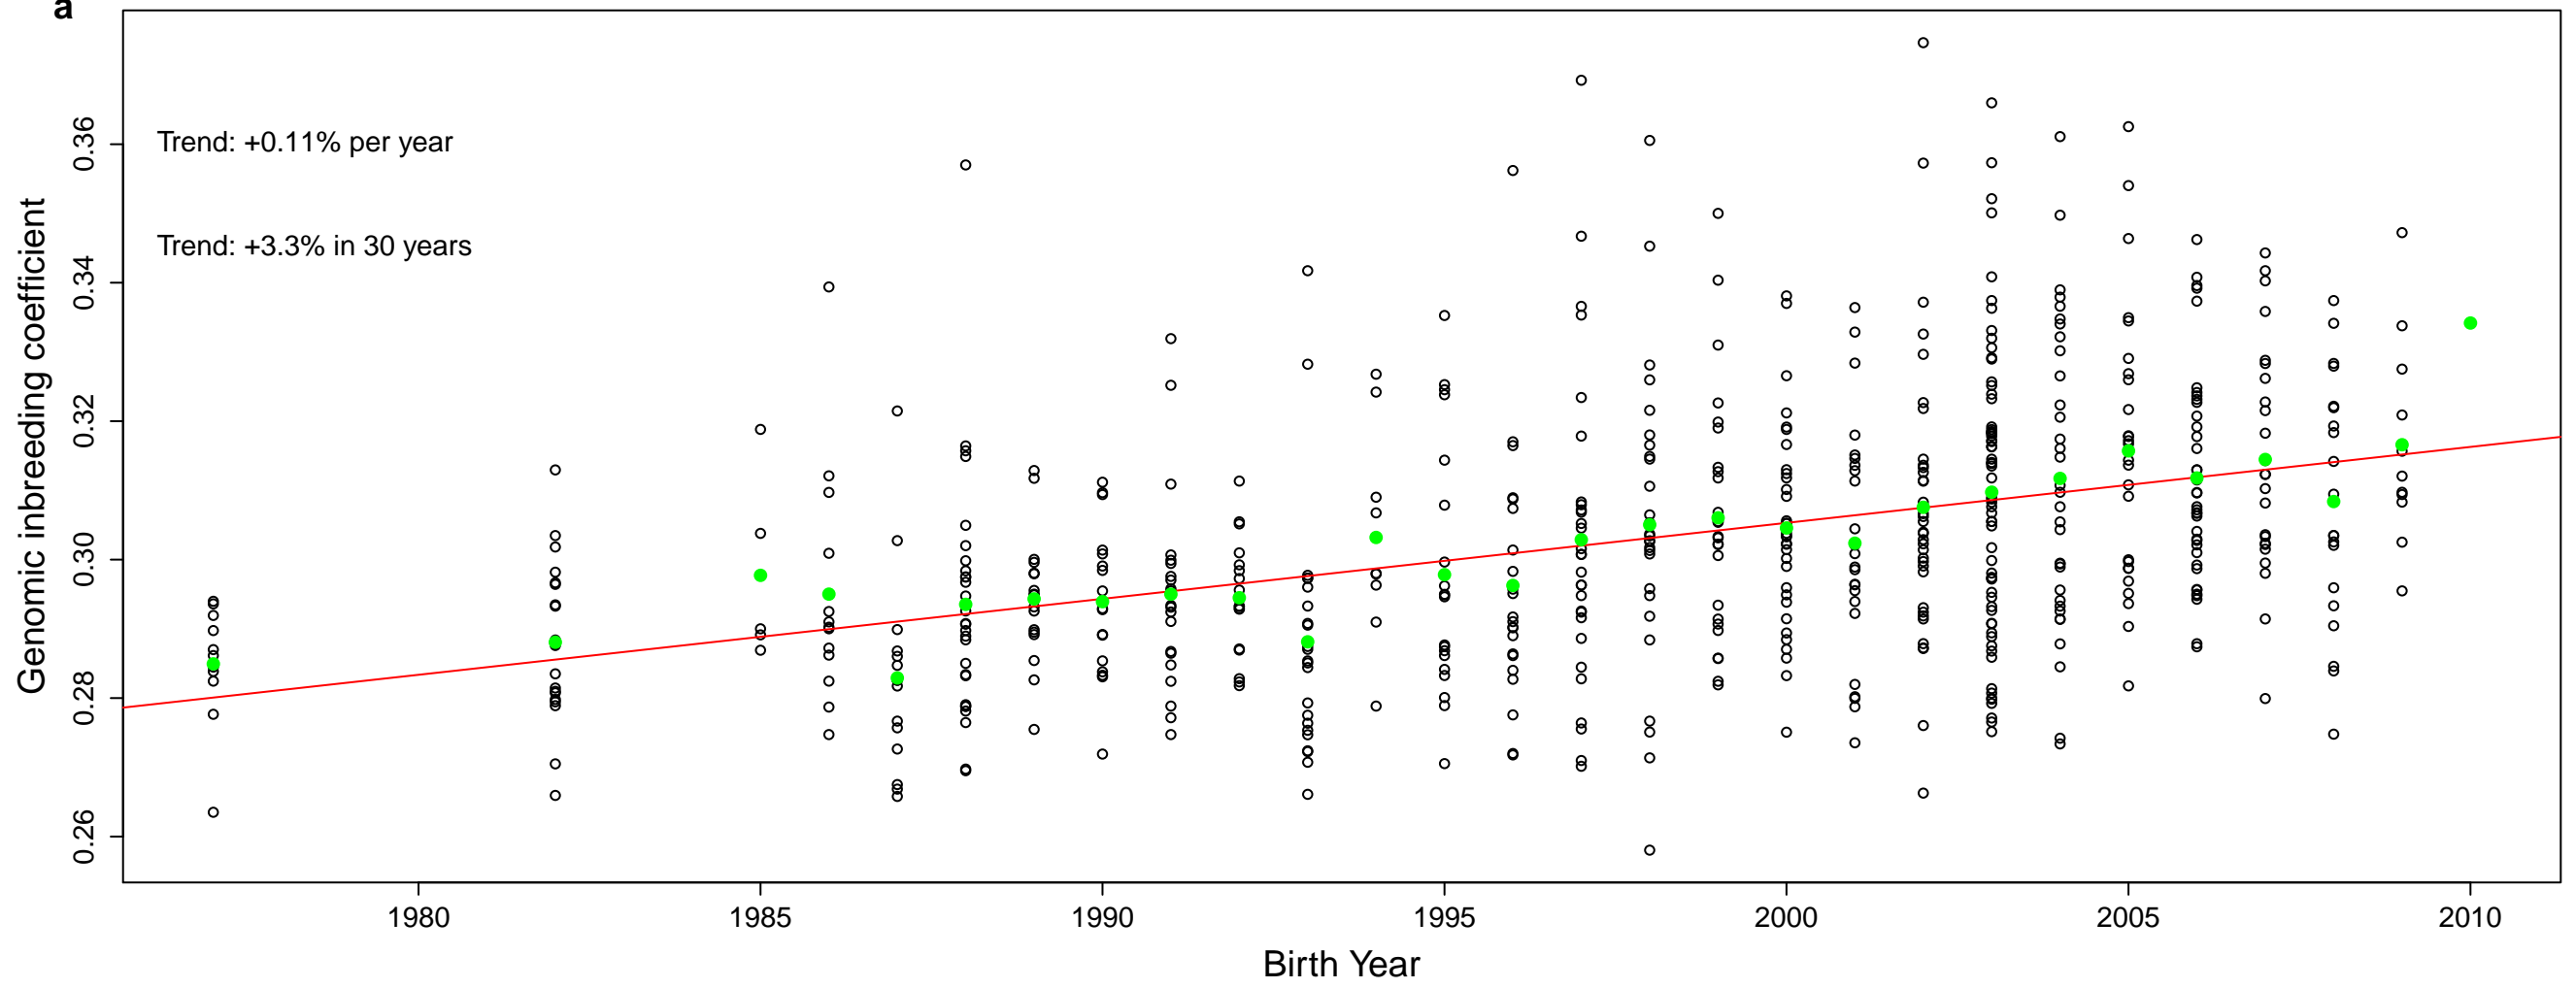**b**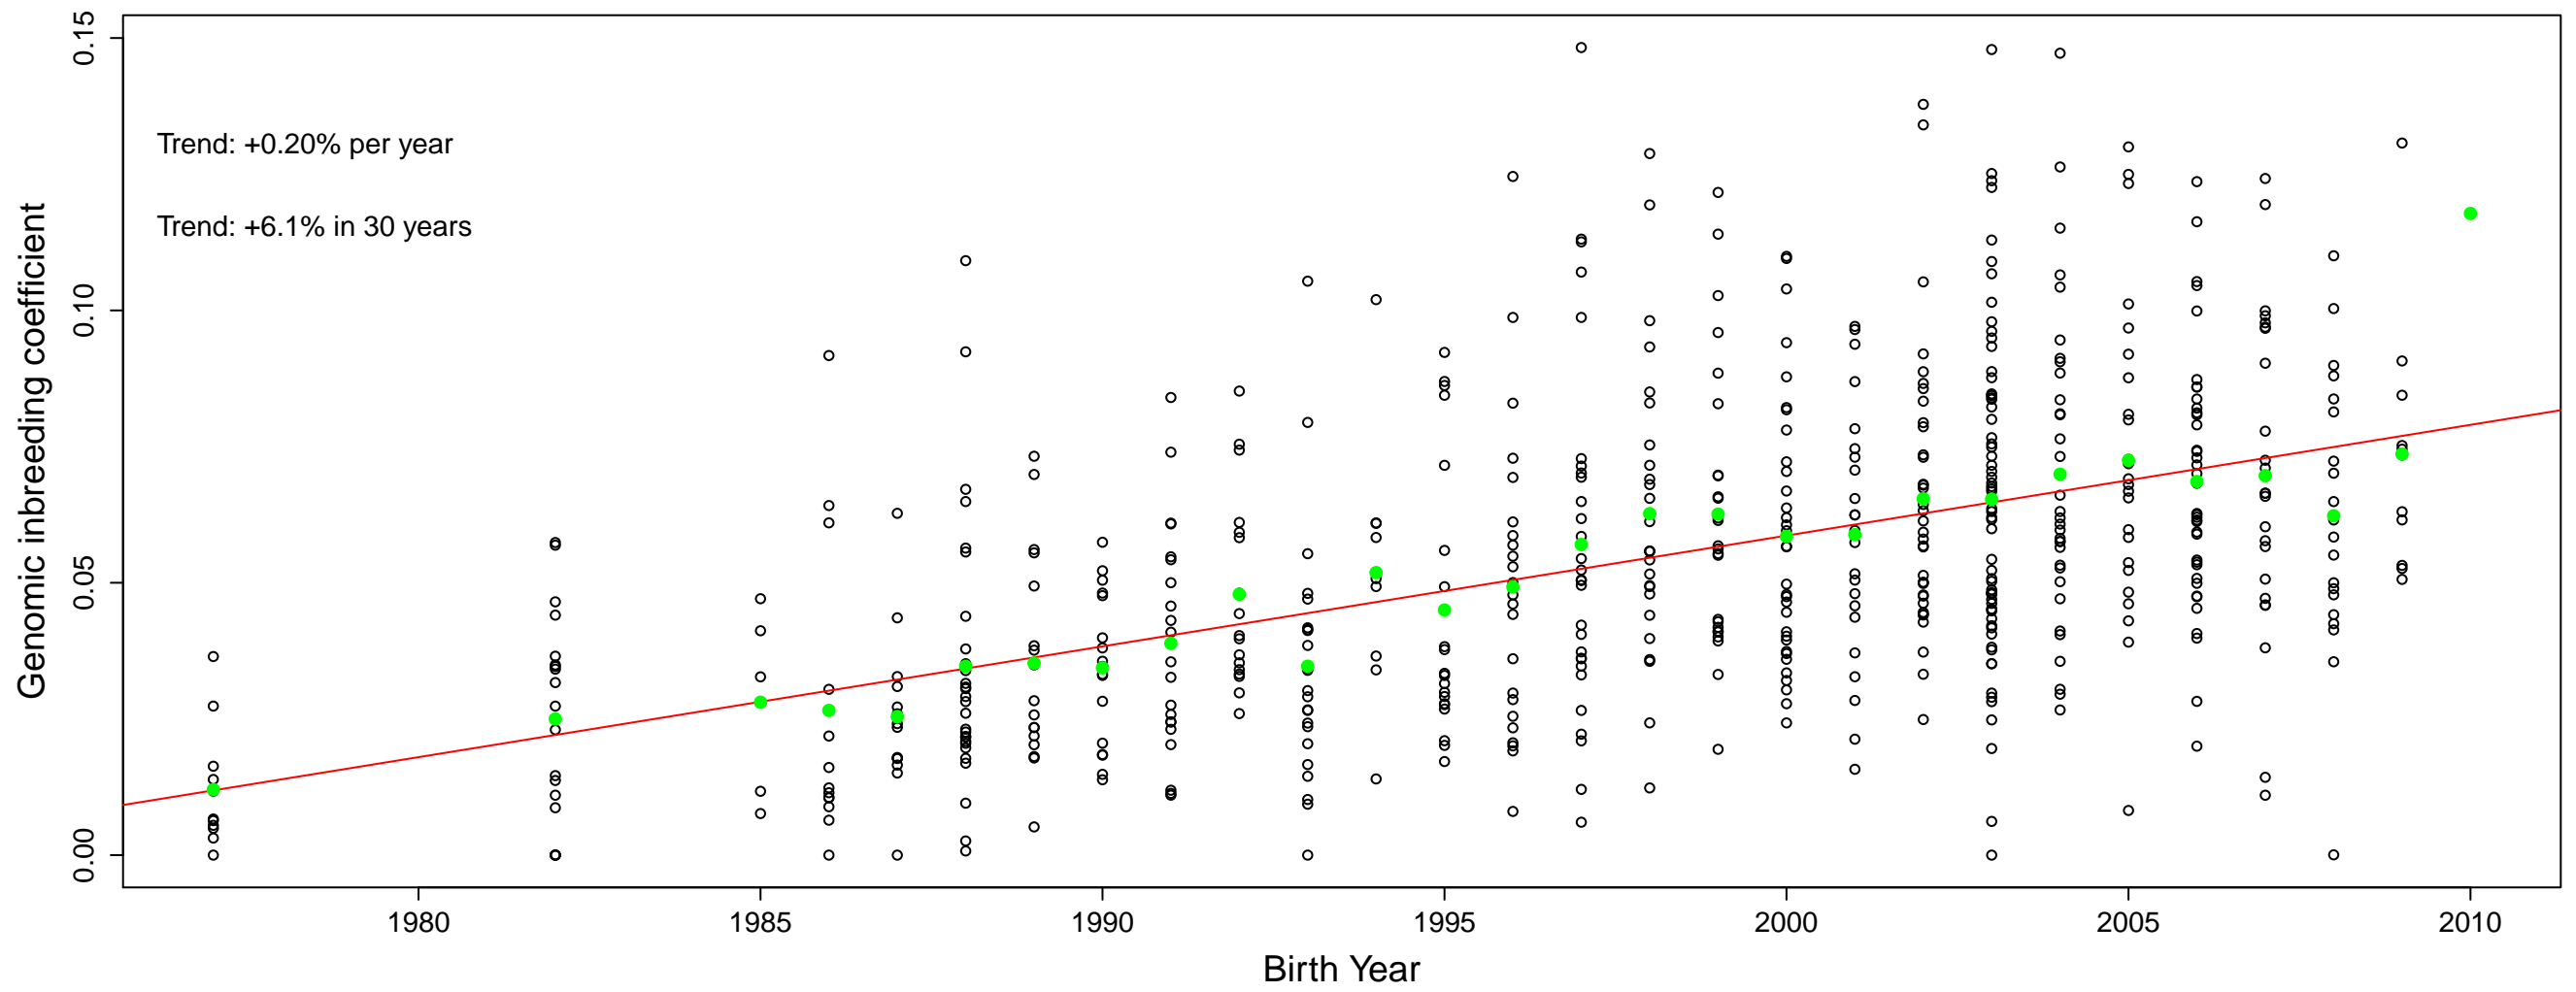**c**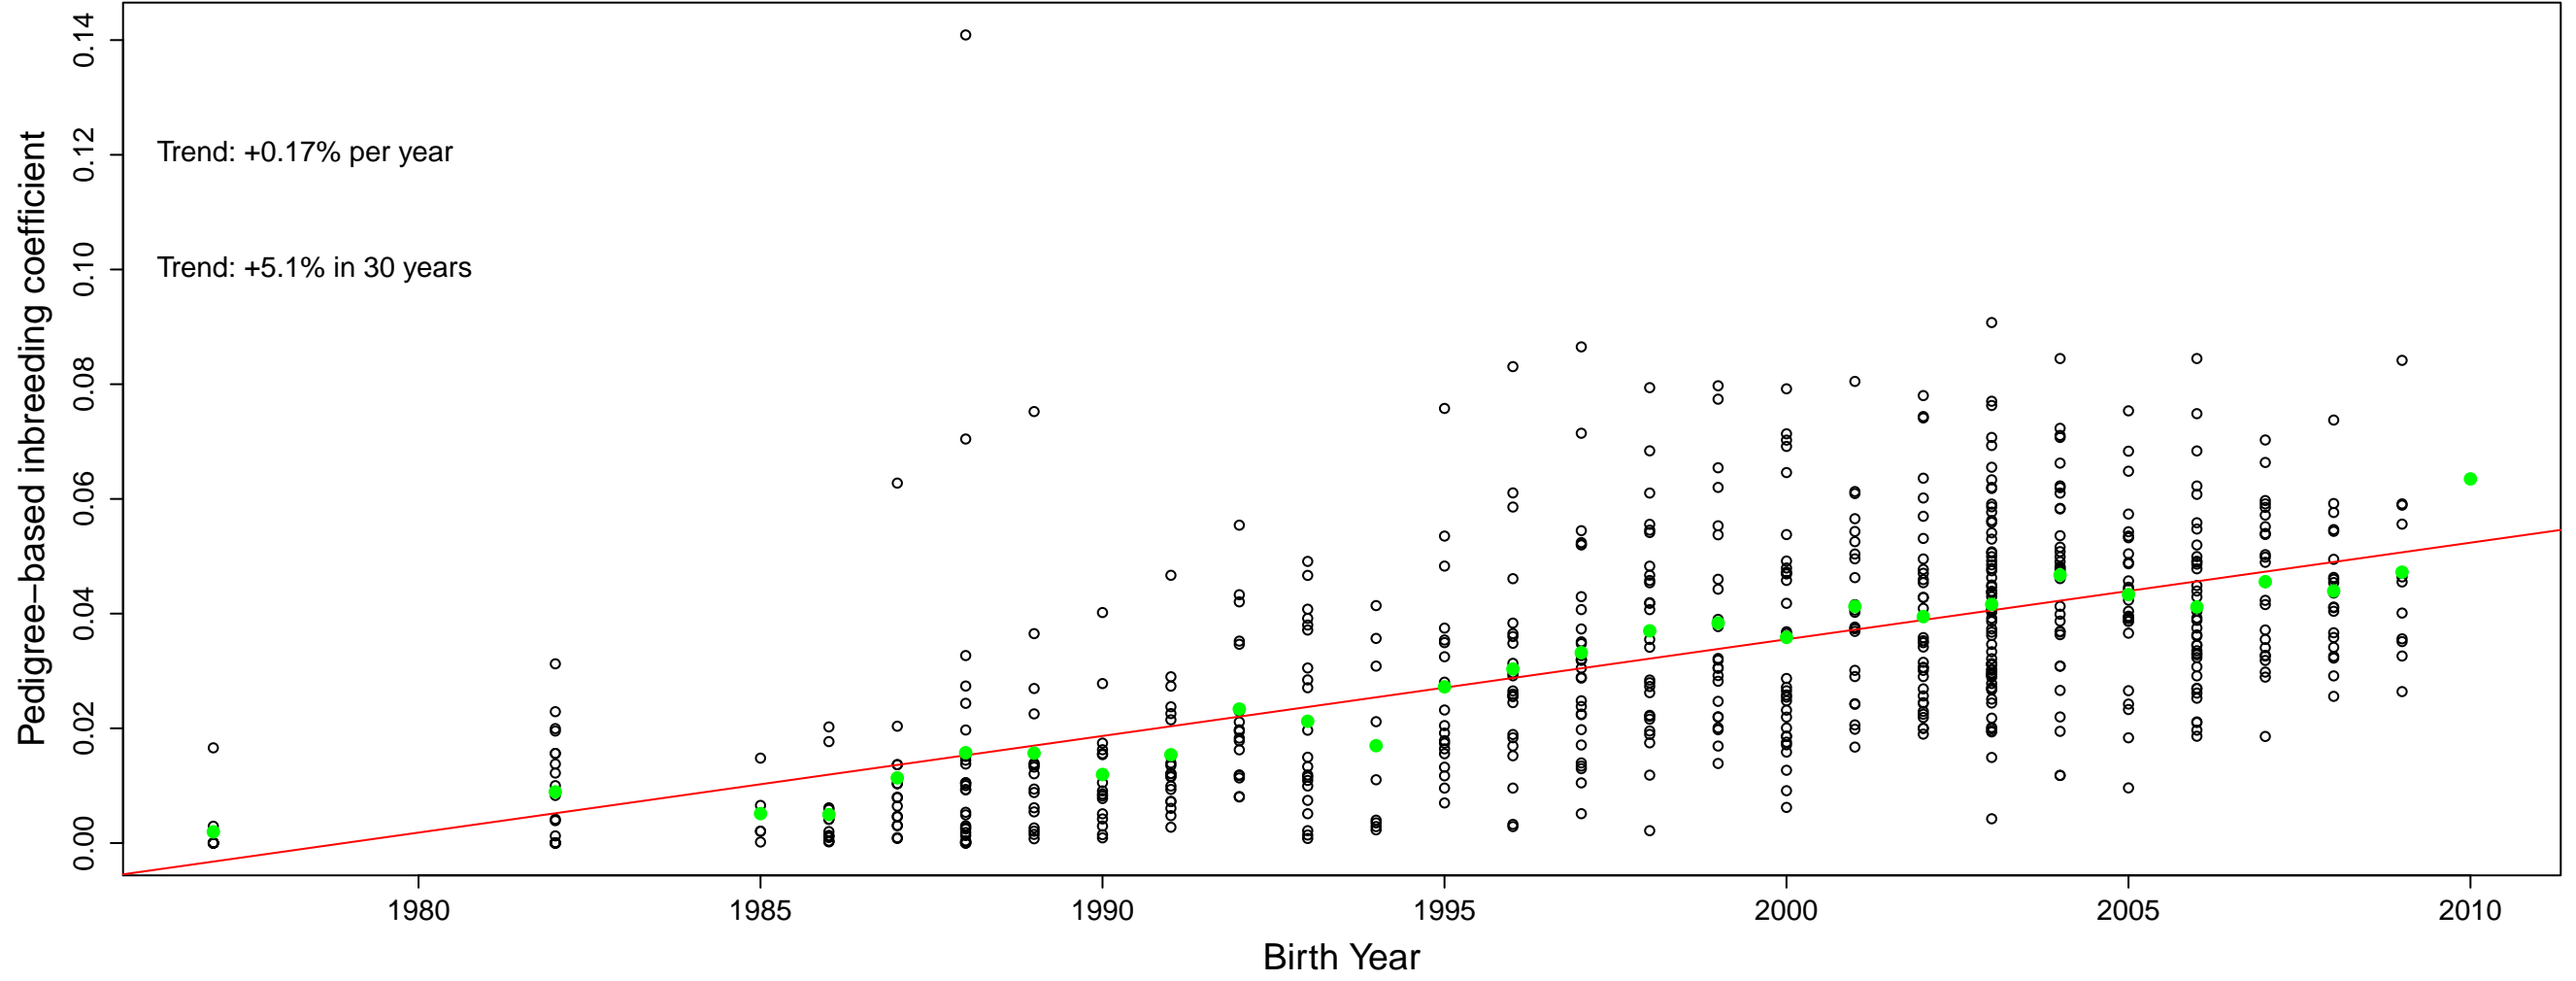

Supplement: MOESM1 [file 12711_2017_370_MOESM1_ESM.pdf]
