# Supplementary material for: Age-based partitioning of individual genomic inbreeding levels in Belgian Blue cattle
Source: Springer Nature journal article supplement (doi:10.1186/s12711-017-0370-x), 2017-12-01

### Angus

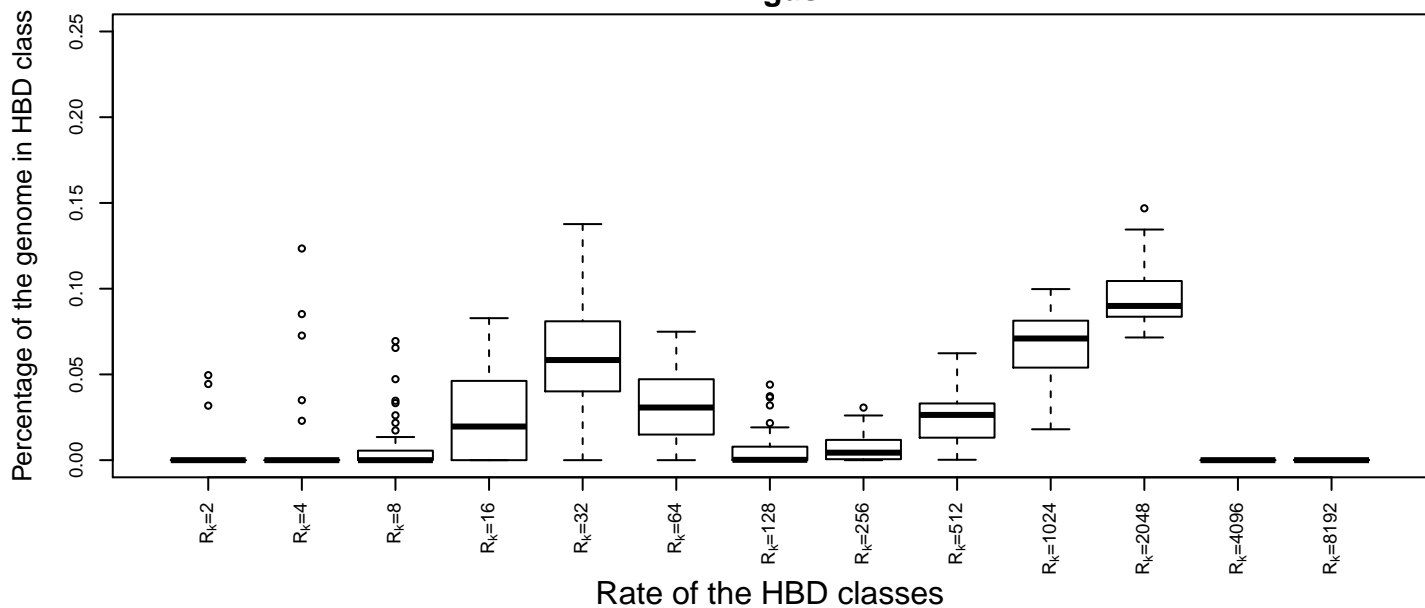

### Brown Swiss

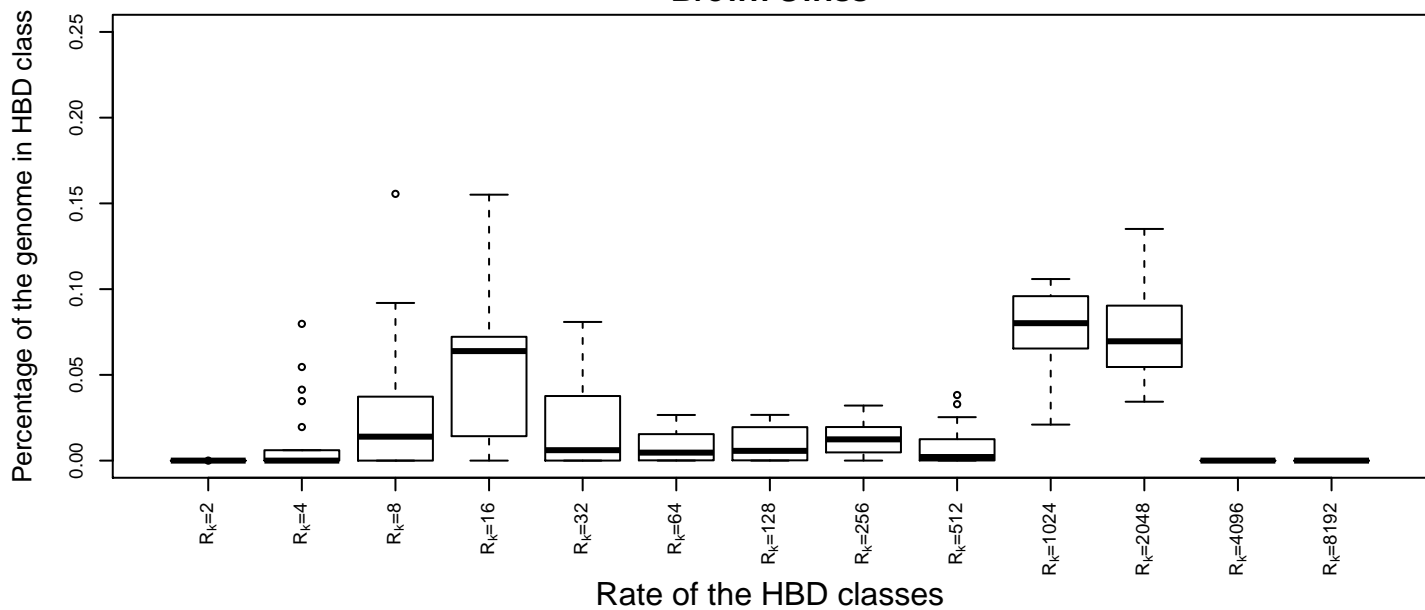

### Charolais-UK

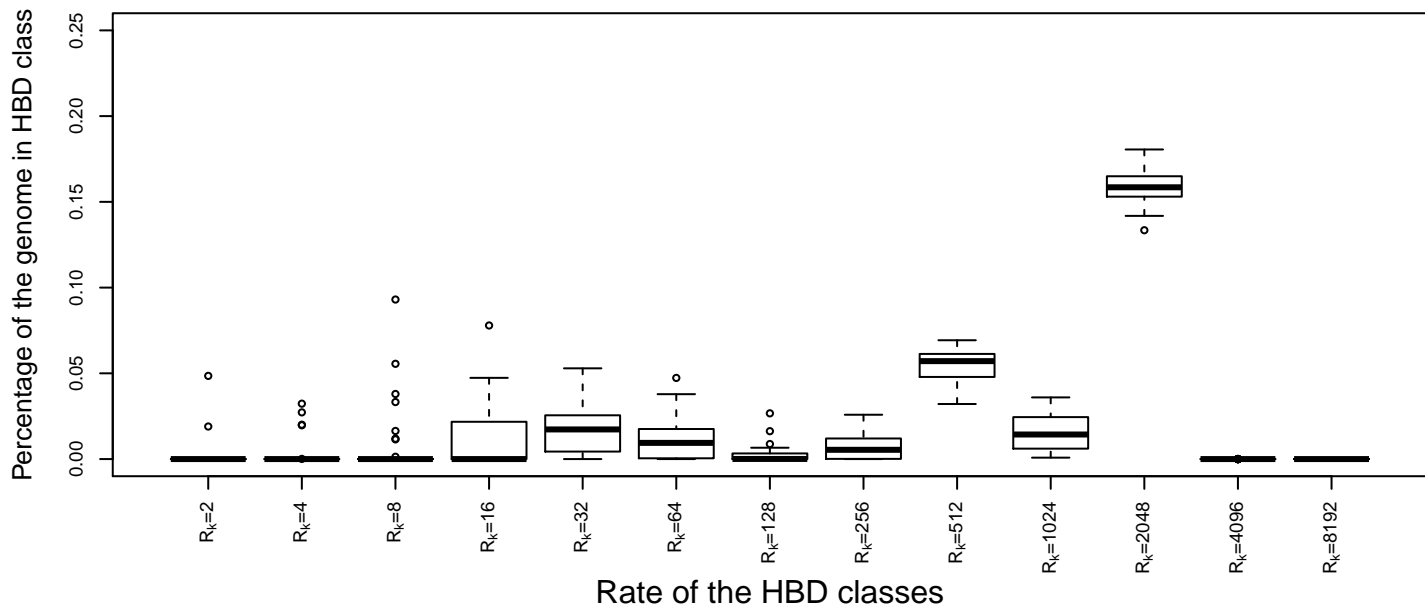

### Guernsey

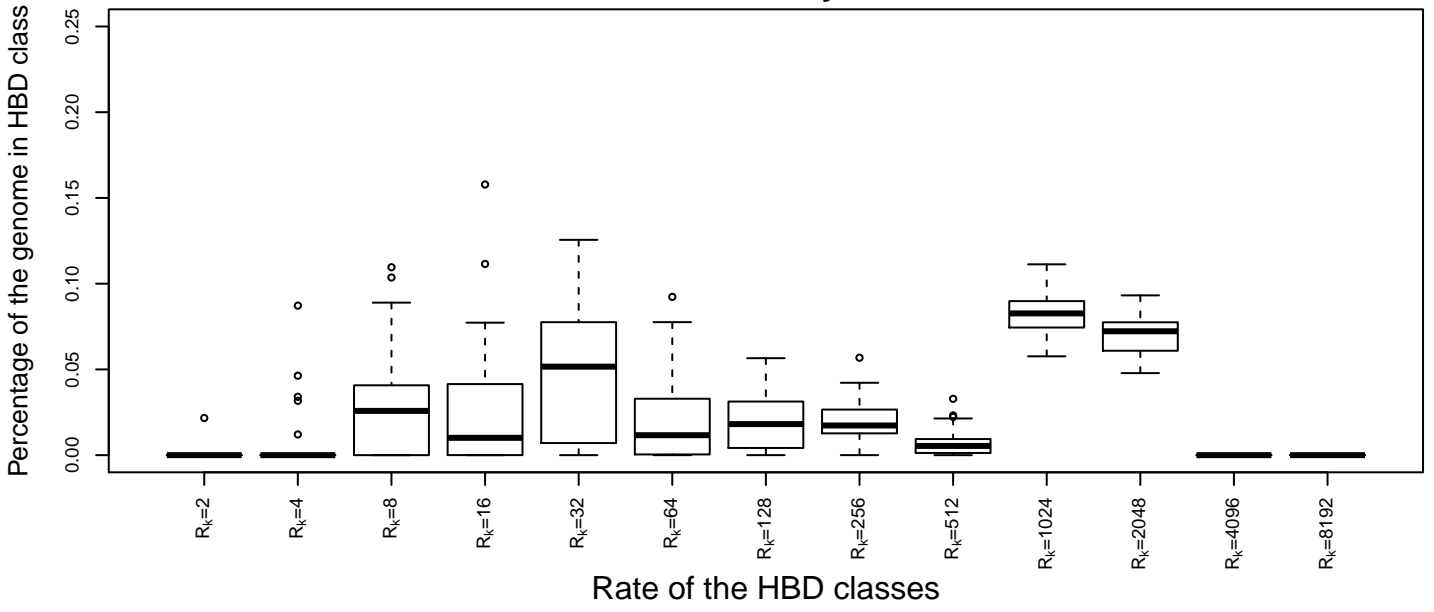

### Hereford

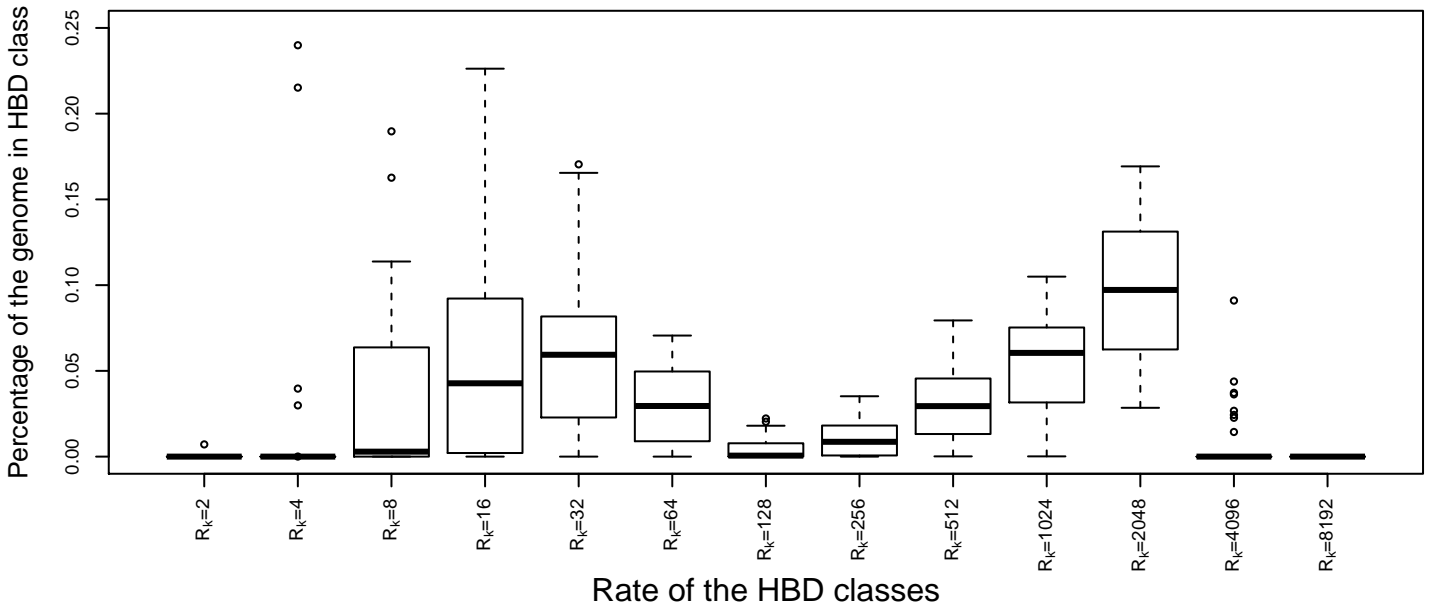

### Holstein

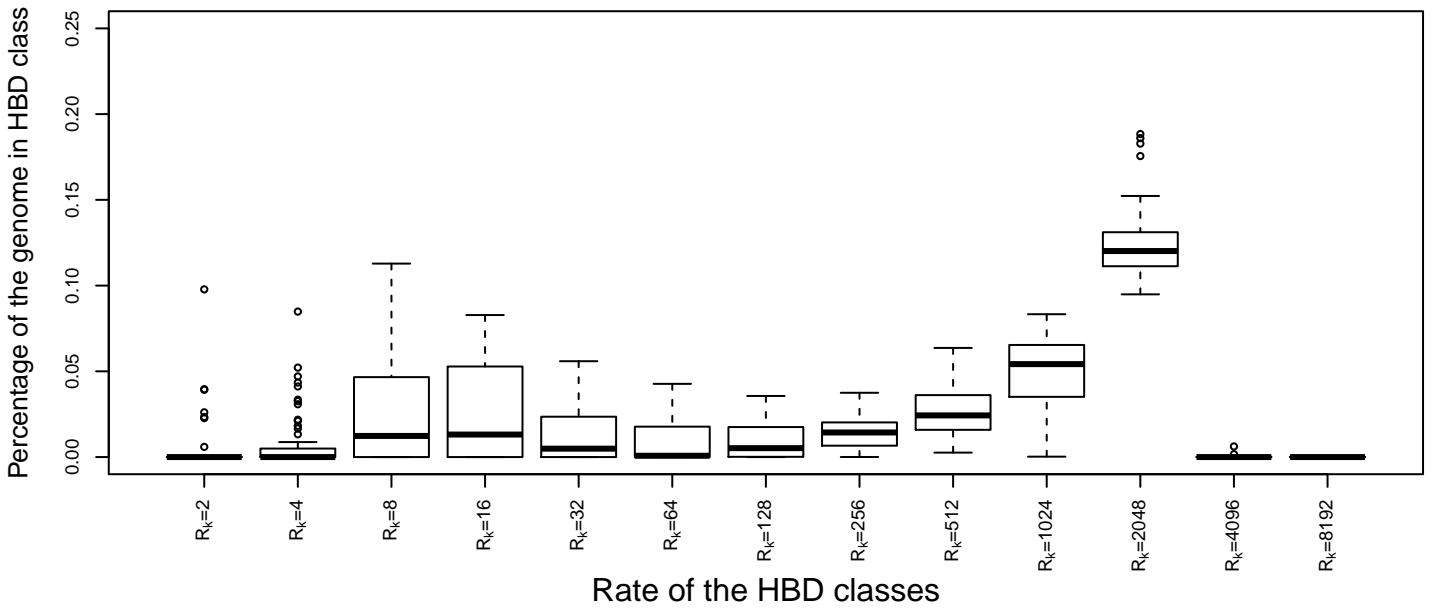

### Jersey

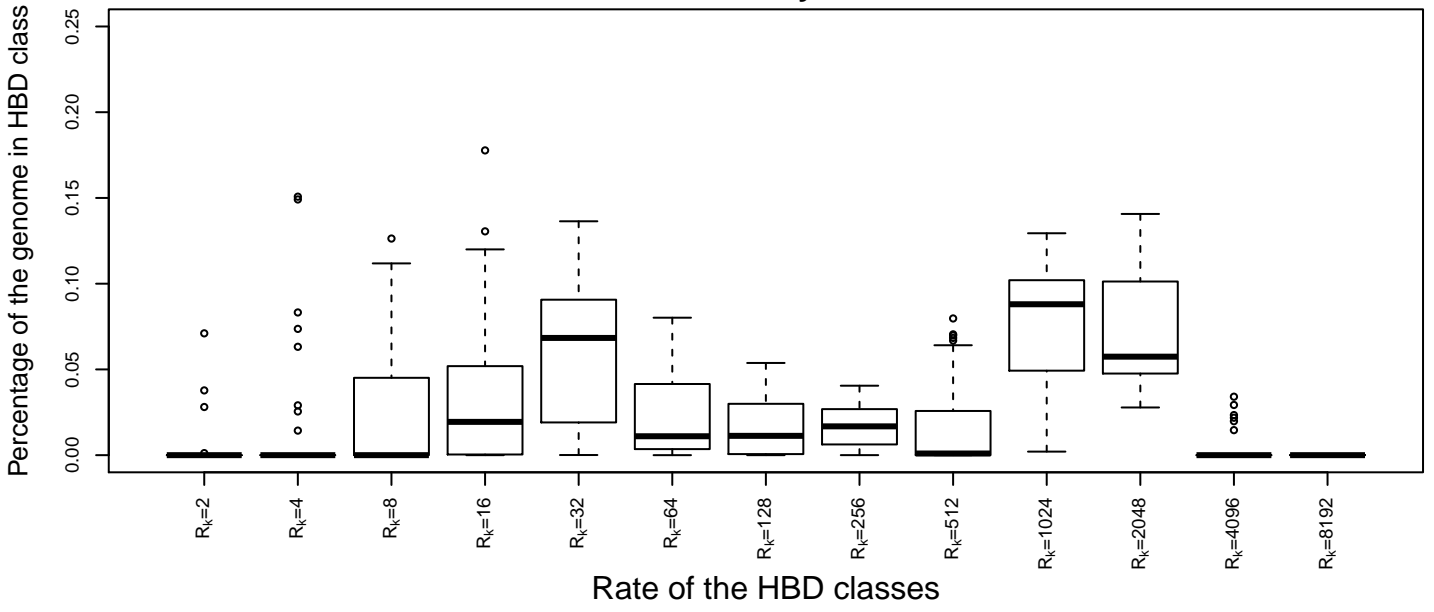

### Limousin

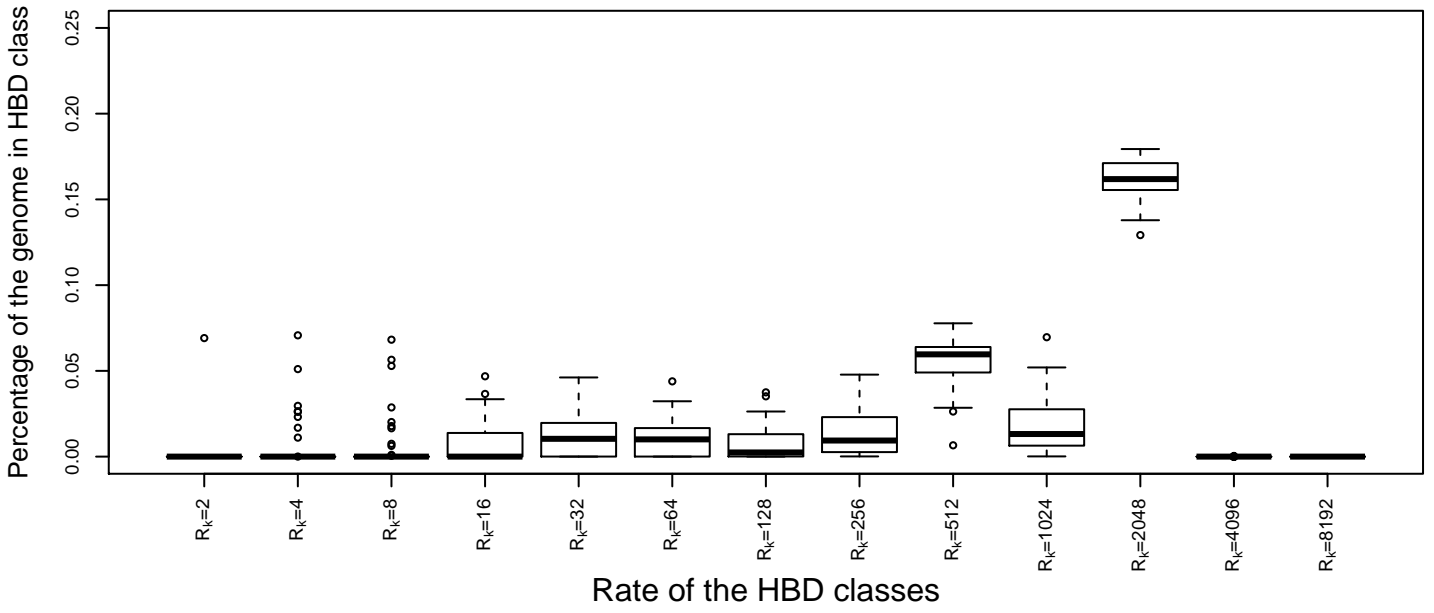

### Piedmontese

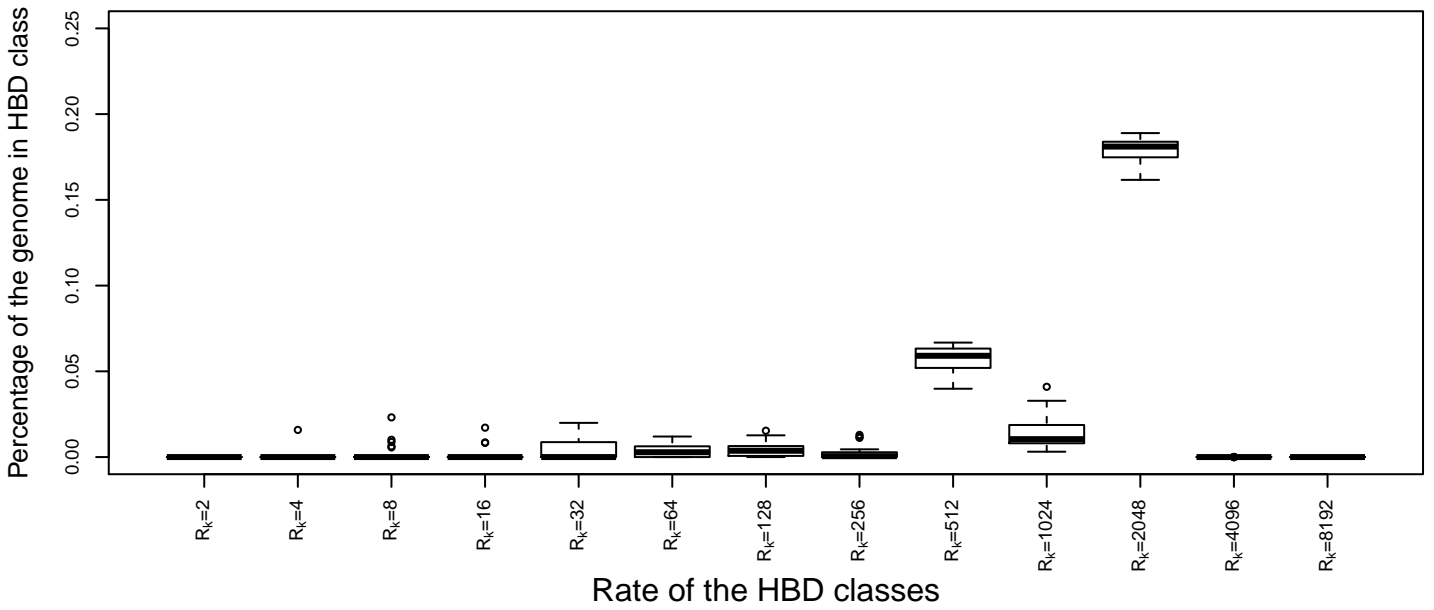

# Romagnola

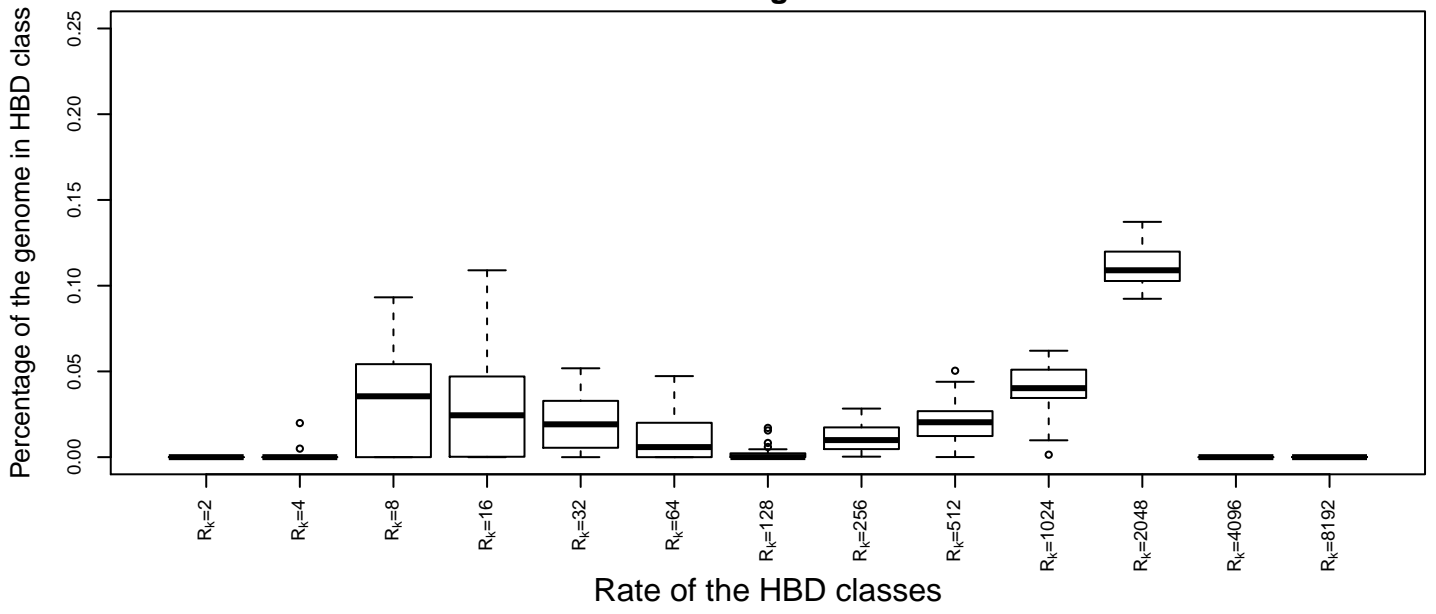

Supplement: MOESM2 [file 12711_2017_370_MOESM2_ESM.pdf]
