# Supplementary material for: Age-based partitioning of individual genomic inbreeding levels in Belgian Blue cattle
Source: Springer Nature journal article supplement (doi:10.1186/s12711-017-0370-x), 2017-12-01

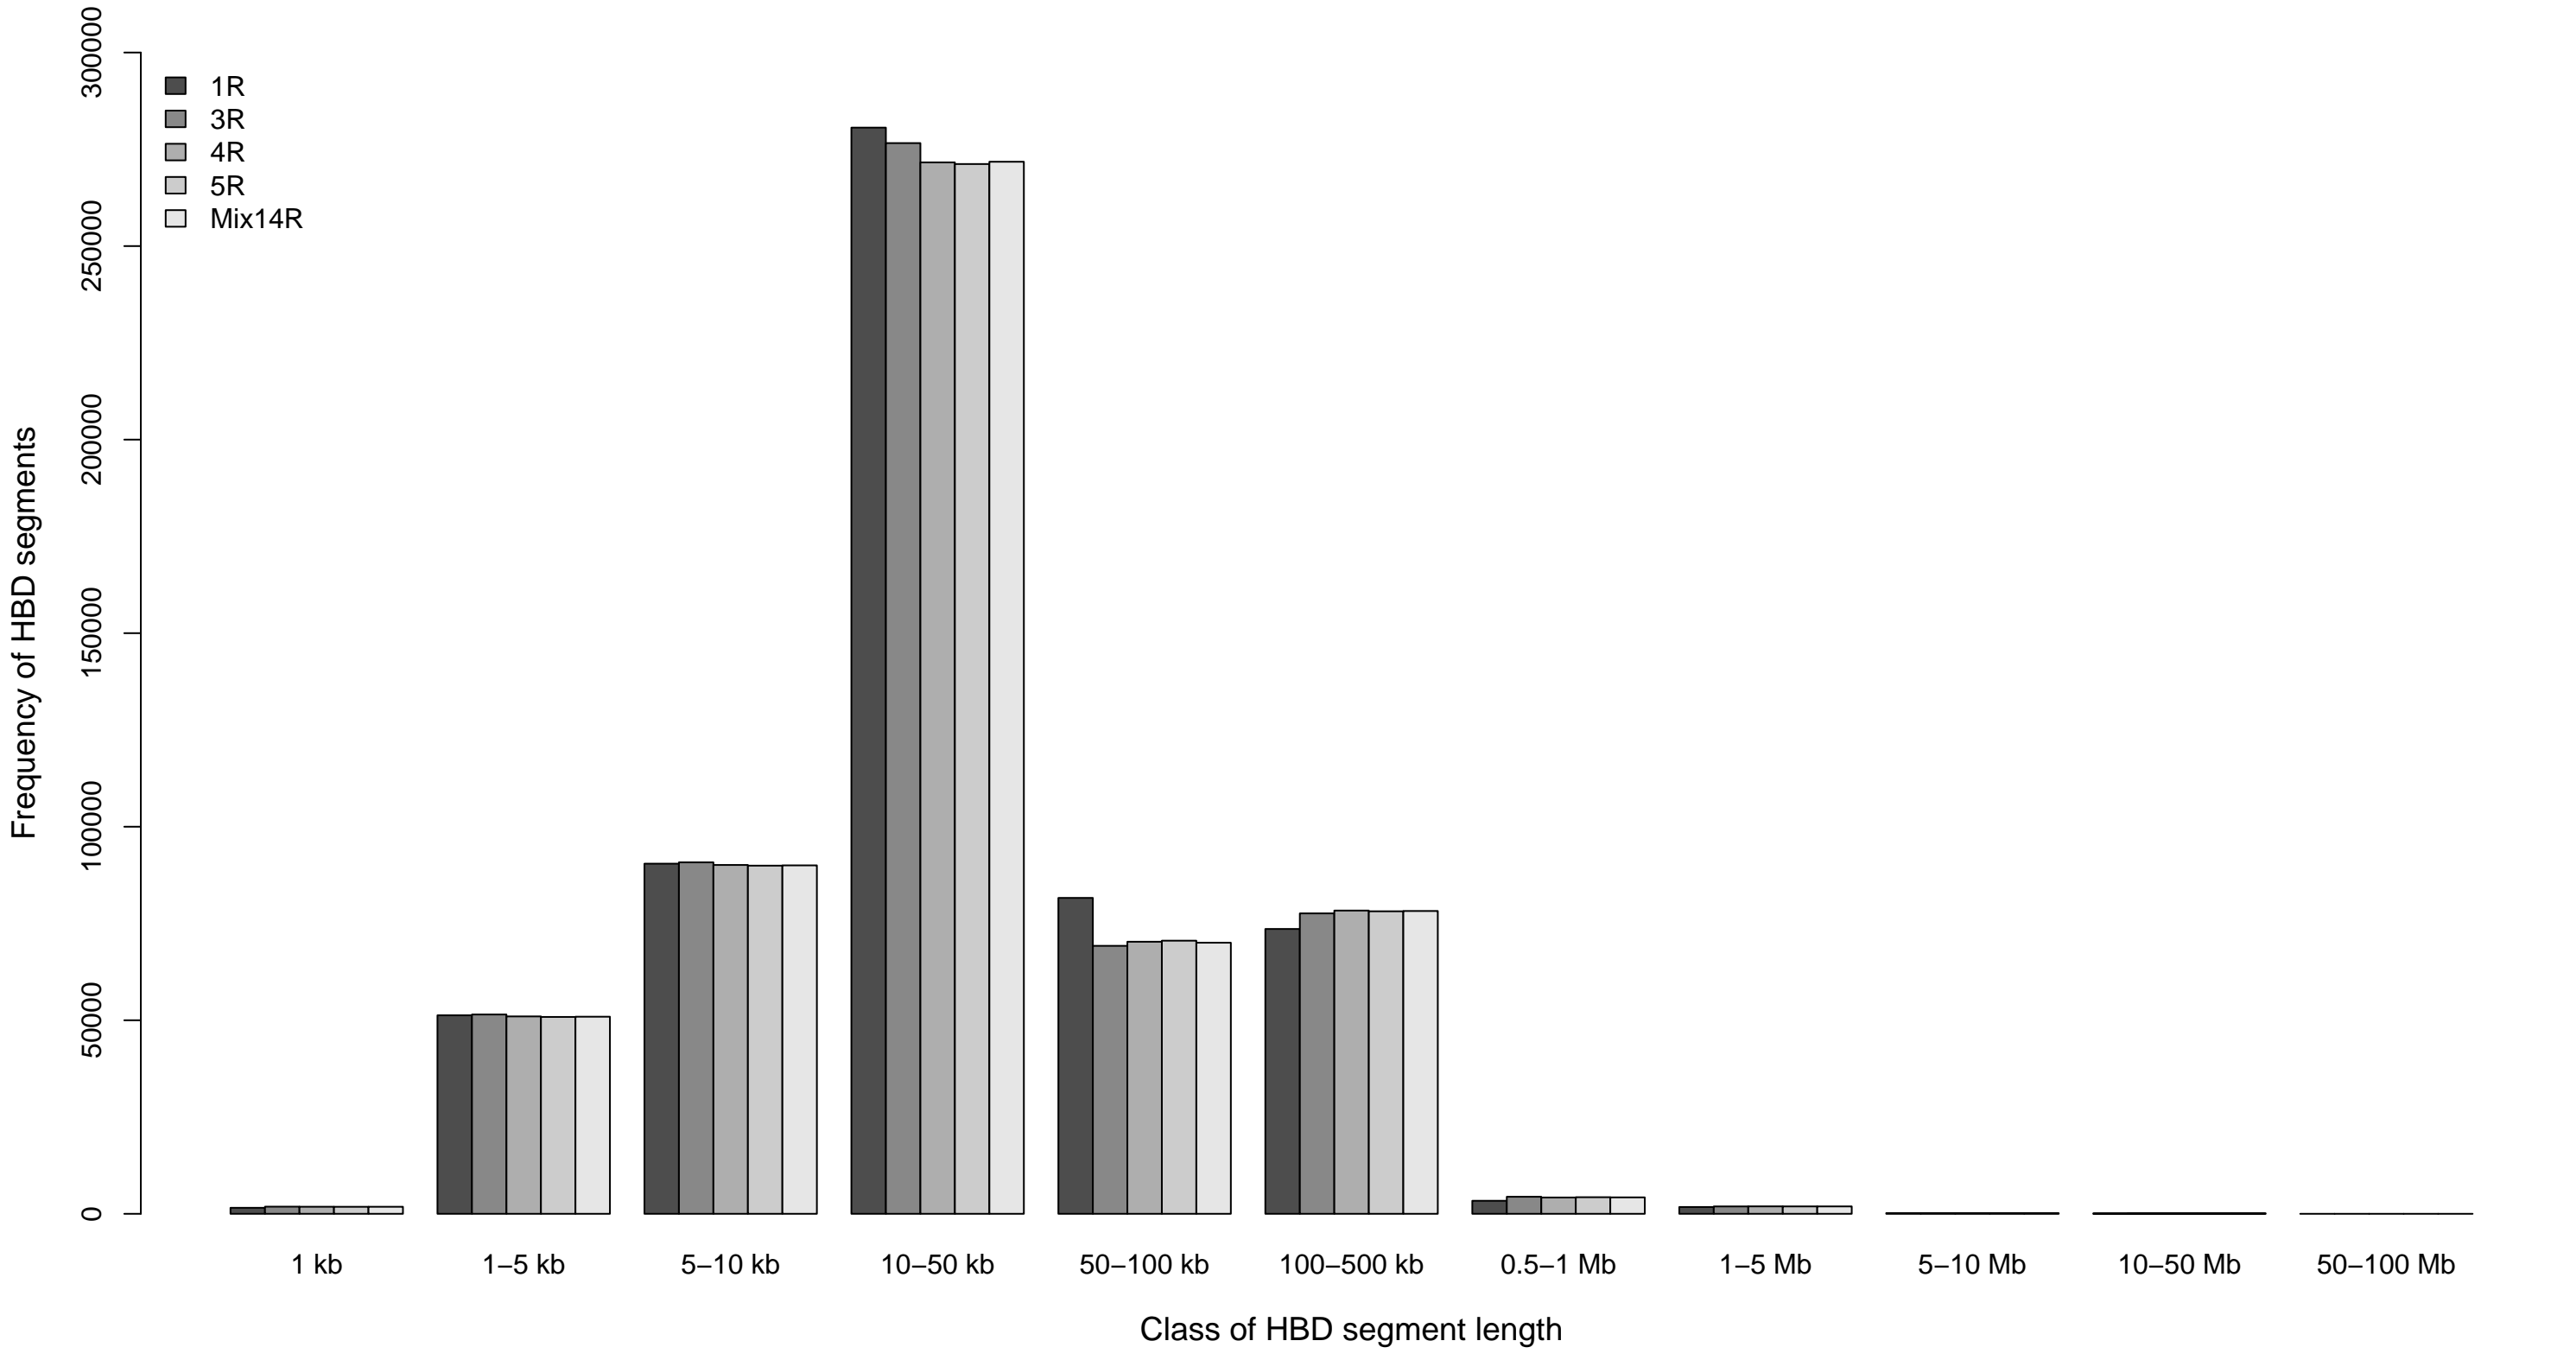

Supplement: MOESM4 [file 12711_2017_370_MOESM4_ESM.pdf]
